# Supplementary figures and images for: LAM Cells as Potential Drivers of Senescence in Lymphangioleiomyomatosis Microenvironment
Source: MDPI journal article supplement (doi:10.3390/ijms23137040), 2022-06-24

Supplemental Figure S1

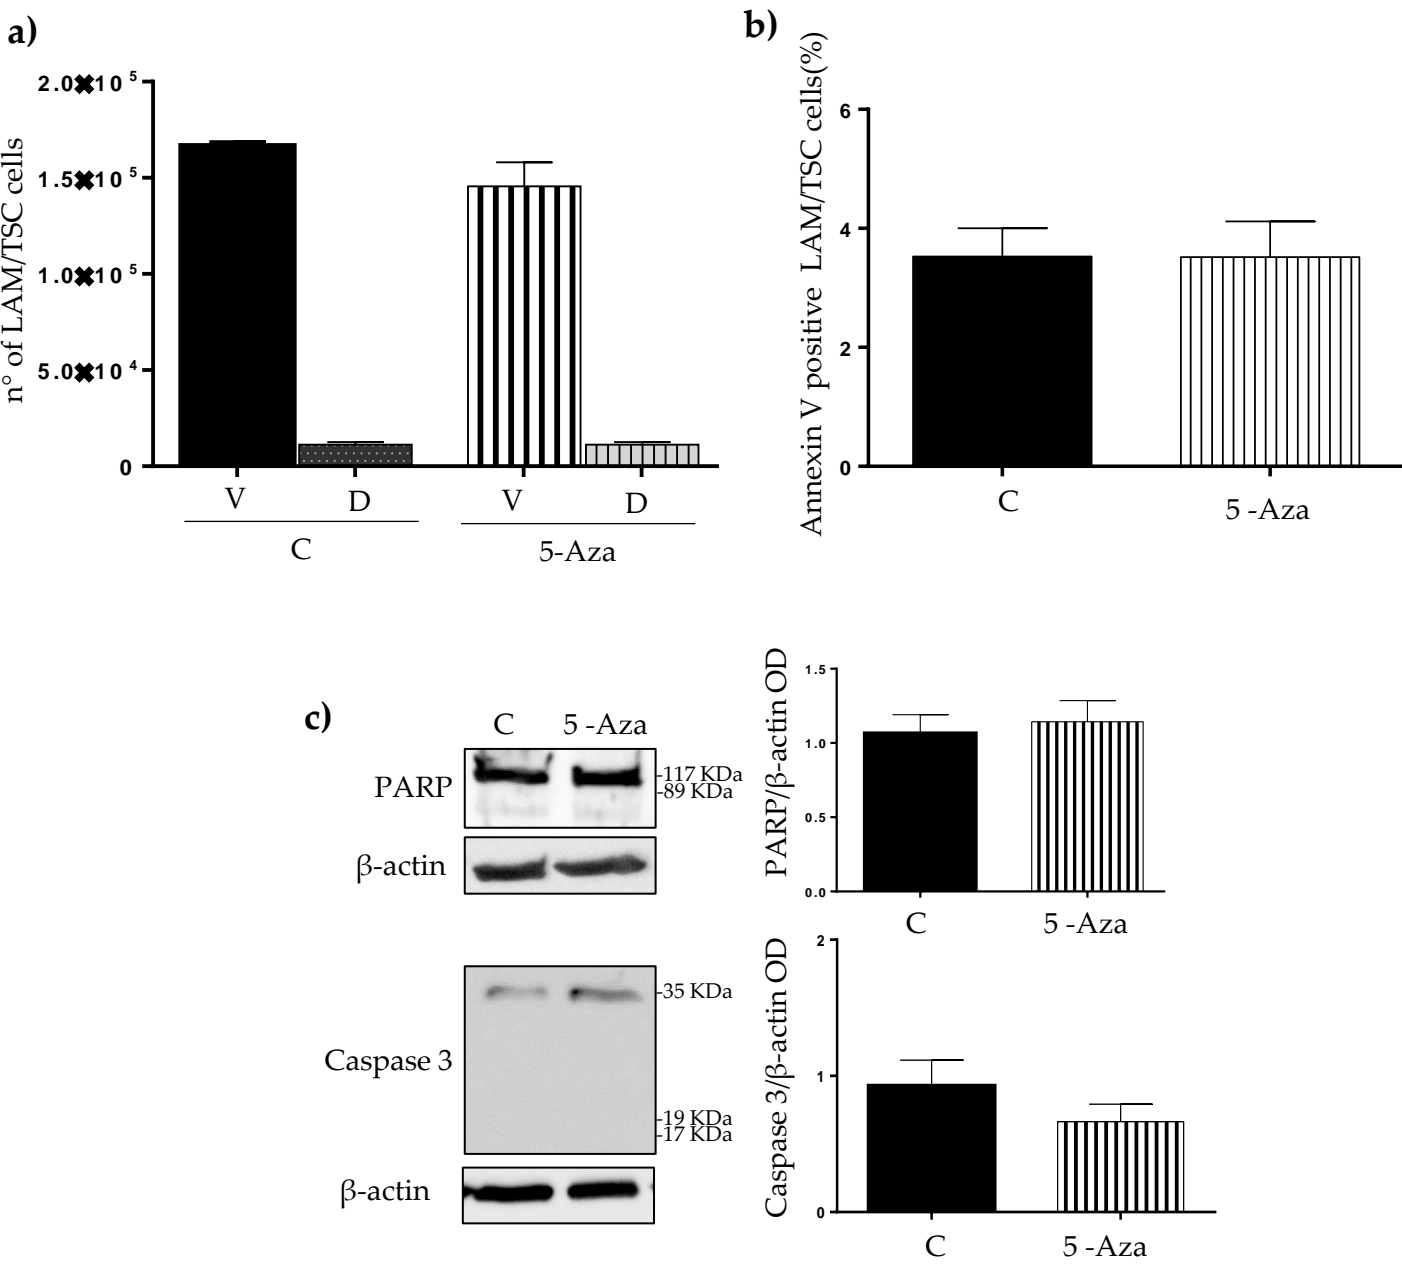

Supplemental Figure S2

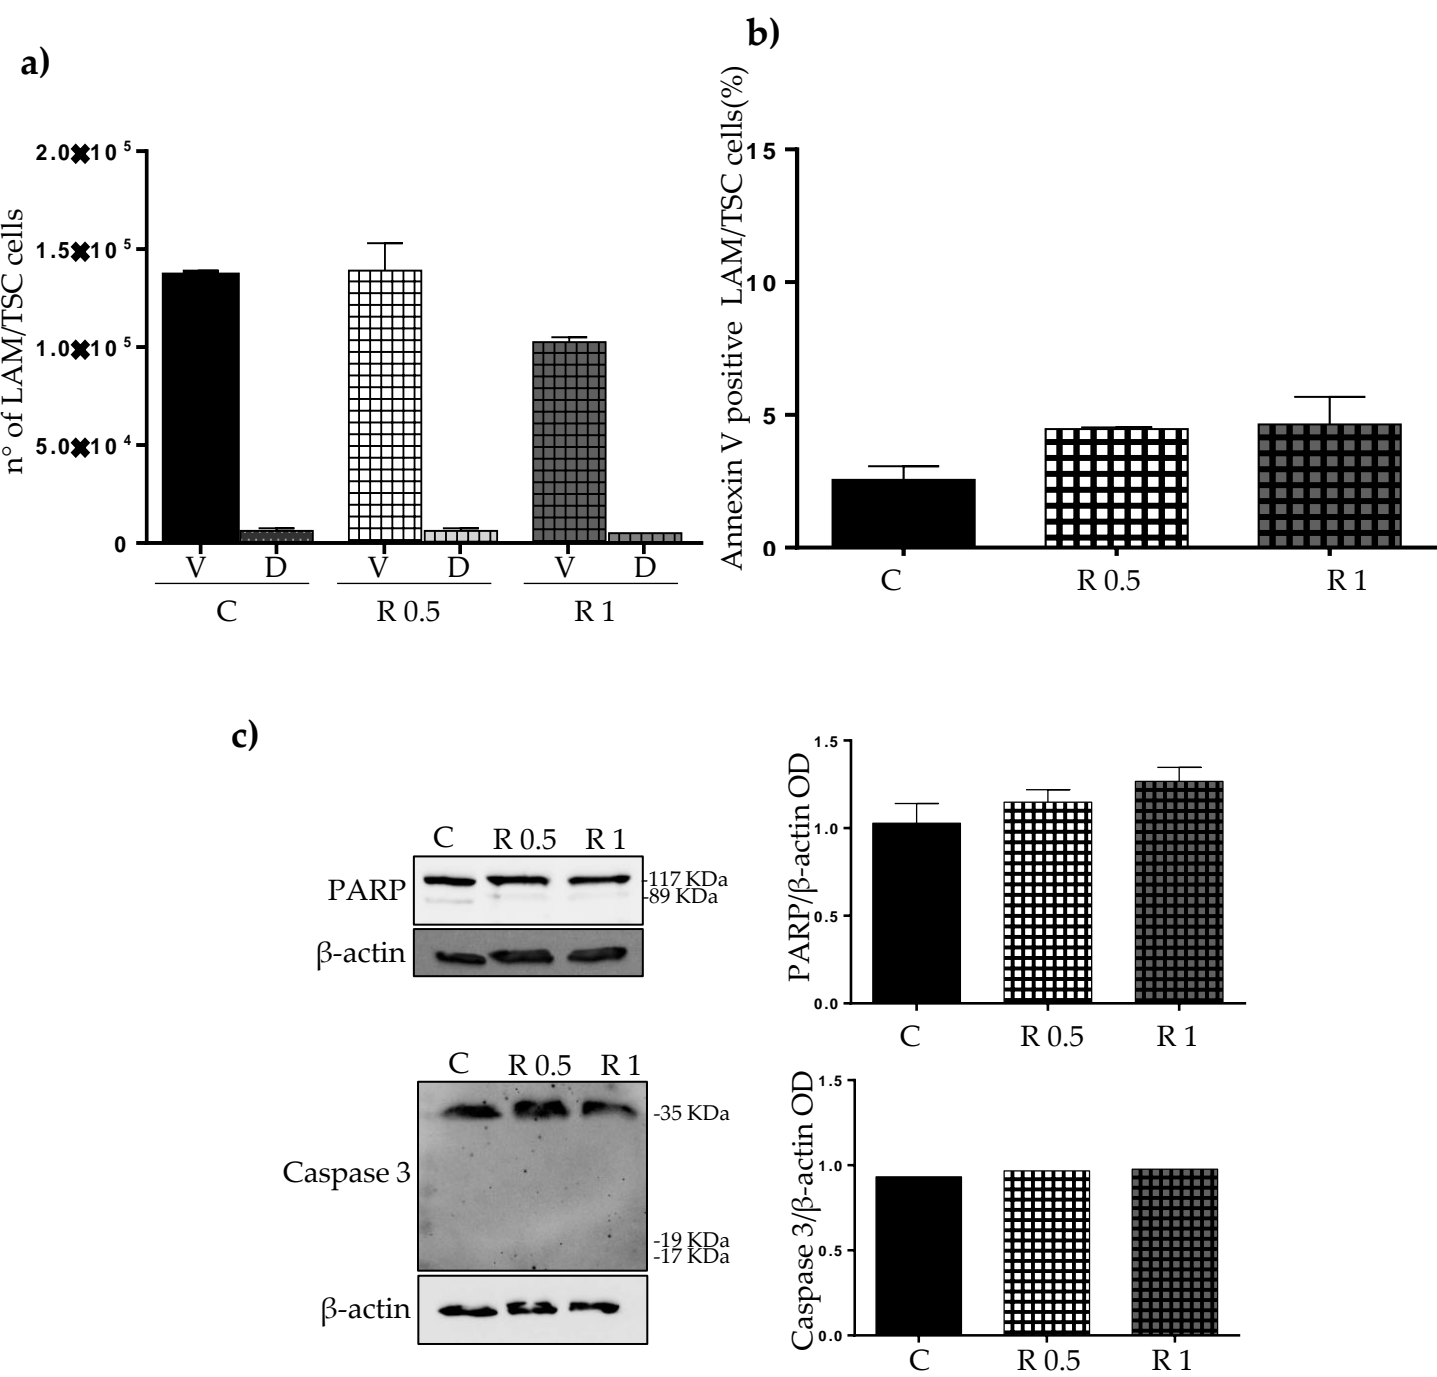

Supplement: s1 [file s1]
